# Supplementary material for: Development of Culture Medium for the Isolation of Flavobacterium and Chryseobacterium from Rhizosphere Soil
Source: PubMed Central journal article supplement (PMC4912144; doi:10.1264/jsme2.me15144), 2016-04-20
Supplement: 31_104_s1.pdf [file 31_104_s1.pdf]

Supplemental Table 1 Closest relatives of partial 16S rRNA genes of the strains isolated in the isolation trial 1-4.

| Strain                                         | Closest relatives                             |                  |                | Alignment | Isolation source             |
|------------------------------------------------|-----------------------------------------------|------------------|----------------|-----------|------------------------------|
|                                                | Microorganism                                 | Accession number | Similarity (%) |           |                              |
| <b>Isolation trial 1 (1/4 TSA<sup>a</sup>)</b> |                                               |                  |                |           |                              |
| GUAF2002                                       | <i>Microbacterium</i> sp. 408                 | GU814036         | 100            | 740/740   | Welsh onion rhizosphere soil |
| GUAF2003                                       | <i>Microbacterium hydrocarbonoxydans</i>      | EU373354         | 99             | 584/585   | Welsh onion rhizosphere soil |
| GUAF2004                                       | <i>Microbacterium hydrocarbonoxydans</i>      | EU373354         | 99             | 788/791   | Welsh onion rhizosphere soil |
| GUAF2005                                       | <i>Microbacterium paraoxydans</i>             | EU221351         | 99             | 809/810   | Welsh onion rhizosphere soil |
| GUAF2006                                       | <i>Microbacterium arabinogalactanolyticum</i> | KM210240         | 100            | 773/773   | Welsh onion rhizosphere soil |
| GUAF2007                                       | <i>Microbacterium hydrocarbonoxydans</i>      | EU373354         | 99             | 699/704   | Welsh onion rhizosphere soil |
| GUAF2008                                       | <i>Microbacterium hydrocarbonoxydans</i>      | EU373354         | 99             | 786/787   | Welsh onion rhizosphere soil |
| GUAF2010                                       | <i>Pseudomonas fluorescens</i>                | KP253039         | 100            | 807/807   | Welsh onion rhizosphere soil |
| GUAF2012                                       | <i>Pseudoxanthomonas</i> sp. LHR-07           | HE716933         | 100            | 785/785   | Welsh onion rhizosphere soil |
| GUAF2013                                       | <i>Microbacterium hydrocarbonoxydans</i>      | EU373354         | 99             | 786/788   | Welsh onion rhizosphere soil |
| GUAF2014                                       | <i>Sphingobium japonicum</i> UT26S            | AP010804         | 98             | 749/757   | Welsh onion rhizosphere soil |
| GUAF2015                                       | <i>Microbacterium paludicola</i>              | AJ853909         | 98             | 724/735   | Welsh onion rhizosphere soil |
| GUAF2019                                       | <i>Microbacterium</i> sp. MA1                 | FJ357539         | 99             | 791/792   | Welsh onion rhizosphere soil |
| GUAF2020                                       | <i>Pseudoxanthomonas mexicana</i>             | JX860406         | 99             | 800/802   | Welsh onion rhizosphere soil |
| GUAF2022                                       | <i>Microbacterium</i> sp. RU-24               | KC405581         | 99             | 792/799   | Welsh onion rhizosphere soil |
| GUAF2024                                       | <i>Pseudoxanthomonas mexicana</i>             | JX860406         | 100            | 804/804   | Welsh onion rhizosphere soil |
| GUAF2025                                       | <i>Microbacterium hydrocarbonoxydans</i>      | EU373354         | 99             | 804/808   | Welsh onion rhizosphere soil |
| GUAF2027                                       | <i>Pseudoxanthomonas mexicana</i>             | JX860406         | 100            | 840/840   | Welsh onion rhizosphere soil |
| GUAF2028                                       | <i>Microbacterium hydrocarbonoxydans</i>      | EU373354         | 99             | 798/803   | Welsh onion rhizosphere soil |
| GUAF2030                                       | <i>Microbacterium hydrocarbonoxydans</i>      | EU373354         | 99             | 845/846   | Welsh onion rhizosphere soil |
| GUAF2031                                       | <i>Pseudoxanthomonas</i> sp. LHR-07           | HE716933         | 100            | 855/855   | Welsh onion rhizosphere soil |
| GUAF2032                                       | <i>Microbacterium hydrocarbonoxydans</i>      | EU373354         | 99             | 788/791   | Welsh onion rhizosphere soil |
| GUAF2033                                       | <i>Pseudoxanthomonas mexicana</i>             | JX860406         | 100            | 826/826   | Welsh onion rhizosphere soil |
| GUAF2035                                       | <i>Microbacterium hydrocarbonoxydans</i>      | EU373354         | 99             | 841/842   | Welsh onion rhizosphere soil |
| GUAF2036                                       | <i>Microbacterium hydrocarbonoxydans</i>      | EU714368         | 98             | 837/846   | Welsh onion rhizosphere soil |
| GUAF2037                                       | <i>Sphingomonas</i> sp. EM0332                | EU448286         | 100            | 858/858   | Welsh onion rhizosphere soil |
| GUAF2038                                       | <i>Pseudoxanthomonas</i> sp. LHR-07           | HE716933         | 99             | 854/855   | Welsh onion rhizosphere soil |
| GUAF2039                                       | <i>Microbacterium foliorum</i>                | KP208636         | 99             | 842/846   | Welsh onion rhizosphere soil |
| GUAF2040                                       | <i>Pseudoxanthomonas mexicana</i>             | JX860406         | 99             | 806/807   | Welsh onion rhizosphere soil |

|          |                                          |          |     |         |                              |
|----------|------------------------------------------|----------|-----|---------|------------------------------|
| GUAF2041 | <i>Pseudoxanthomonas mexicana</i>        | KM210271 | 99  | 831/832 | Welsh onion rhizosphere soil |
| GUAF2042 | <i>Pseudoxanthomonas</i> sp. LHR-07      | HE716933 | 100 | 803/803 | Welsh onion rhizosphere soil |
| GUAF2043 | <i>Microbacterium xylanilyticum</i>      | AJ853908 | 100 | 847/847 | Welsh onion rhizosphere soil |
| GUAF2044 | <i>Microbacterium hydrocarbonoxydans</i> | EU373354 | 99  | 827/828 | Welsh onion rhizosphere soil |

#### Isolation trial 1 (R2A<sup>b</sup>)

|          |                                           |          |     |         |                              |
|----------|-------------------------------------------|----------|-----|---------|------------------------------|
| GUAF3001 | <i>Niabella yanshanensis</i>              | KC854959 | 99  | 797/800 | Welsh onion rhizosphere soil |
| GUAF3002 | <i>Chryseobacterium</i> sp. MN13.3d       | AM159535 | 99  | 807/810 | Welsh onion rhizosphere soil |
| GUAF3003 | <i>Rhodococcus</i> sp. Eu-32              | DQ386111 | 99  | 842/843 | Welsh onion rhizosphere soil |
| GUAF3004 | <i>Sphingomonas</i> sp. M37-VN10-2W       | AB299579 | 100 | 833/833 | Welsh onion rhizosphere soil |
| GUAF3005 | <i>Lysobacter</i> sp. JC174               | HF536576 | 99  | 848/854 | Welsh onion rhizosphere soil |
| GUAF3006 | <i>Mycobacterium neoaurum</i> VKM Ac-1815 | CP006936 | 100 | 824/824 | Welsh onion rhizosphere soil |
| GUAF3007 | <i>Cellulosimicrobium cellulans</i>       | X79453   | 100 | 837/837 | Welsh onion rhizosphere soil |
| GUAF3009 | <i>Sphingopyxis</i> sp. MC1               | JN940802 | 100 | 844/844 | Welsh onion rhizosphere soil |
| GUAF3010 | <i>Sphingomonas</i> sp. EM0332            | EU448286 | 100 | 834/834 | Welsh onion rhizosphere soil |
| GUAF3012 | <i>Sphingomonas</i> sp. EM0332            | EU448286 | 100 | 836/836 | Welsh onion rhizosphere soil |
| GUAF3013 | <i>Sphingomonas</i> sp. M37-VN10-2W       | AB299579 | 99  | 836/837 | Welsh onion rhizosphere soil |
| GUAF3014 | <i>Sphingomonas</i> sp. W2.10-2           | JX458462 | 99  | 862/864 | Welsh onion rhizosphere soil |
| GUAF3015 | <i>Sphingomonas</i> sp. W2.10-2           | JX458462 | 99  | 859/861 | Welsh onion rhizosphere soil |
| GUAF3016 | <i>Sphingomonas</i> sp. W2.10-2           | JX458462 | 99  | 842/843 | Welsh onion rhizosphere soil |
| GUAF3017 | <i>Sphingomonas</i> sp. W2.10-2           | JX458462 | 100 | 821/821 | Welsh onion rhizosphere soil |
| GUAF3018 | <i>Sphingomonas</i> sp. W2.10-2           | JX458462 | 100 | 841/841 | Welsh onion rhizosphere soil |
| GUAF3019 | <i>Sphingomonas</i> sp. M37-VN10-2W       | AB299579 | 99  | 836/837 | Welsh onion rhizosphere soil |
| GUAF3020 | <i>Sphingomonas</i> sp. W2.10-2           | JX458462 | 100 | 821/821 | Welsh onion rhizosphere soil |
| GUAF3021 | <i>Sphingomonas</i> sp. W2.10-2           | JX458462 | 100 | 821/821 | Welsh onion rhizosphere soil |
| GUAF3022 | <i>Luteibacter</i> sp. UR 6-04            | KM253215 | 99  | 833/840 | Welsh onion rhizosphere soil |
| GUAF3023 | <i>Sphingomonas</i> sp. W2.10-2           | JX458462 | 100 | 842/842 | Welsh onion rhizosphere soil |
| GUAF3024 | <i>Niabella yanshanensis</i>              | KC854959 | 100 | 844/844 | Welsh onion rhizosphere soil |
| GUAF3025 | <i>Sphingomonas</i> sp. W2.10-2           | JX458462 | 100 | 843/843 | Welsh onion rhizosphere soil |
| GUAF3026 | <i>Microbacterium</i> sp. HT-Z89-B1       | KJ526938 | 100 | 834/834 | Welsh onion rhizosphere soil |
| GUAF3027 | <i>Aeromicrobium tamlense</i>             | DQ411541 | 99  | 811/812 | Welsh onion rhizosphere soil |
| GUAF3028 | <i>Sphingopyxis</i> sp. TBD181            | LC005606 | 100 | 834/834 | Welsh onion rhizosphere soil |
| GUAF3029 | <i>Sphingomonas</i> sp. M37-VN10-2W       | AB299579 | 100 | 817/817 | Welsh onion rhizosphere soil |

|          |                                       |          |     |         |                              |
|----------|---------------------------------------|----------|-----|---------|------------------------------|
| GUAF3030 | <i>Rhodanobacter lindaniclasticus</i> | AB245365 | 99  | 849/850 | Welsh onion rhizosphere soil |
| GUAF3031 | <i>Sphingomonas</i> sp. M37-VN10-2W   | AB299579 | 100 | 845/845 | Welsh onion rhizosphere soil |
| GUAF3032 | <i>Sphingomonas</i> sp. W2.10-2       | JX458462 | 100 | 843/843 | Welsh onion rhizosphere soil |
| GUAF3034 | <i>Sphingomonas</i> sp. M37-VN10-2W   | AB299579 | 99  | 835/836 | Welsh onion rhizosphere soil |
| GUAF3035 | <i>Sphingopyxis</i> sp. TBD181        | LC005606 | 100 | 834/834 | Welsh onion rhizosphere soil |
| GUAF3036 | <i>Caulobacter</i> sp. HWE-A01        | JF722654 | 99  | 834/835 | Welsh onion rhizosphere soil |
| GUAF3037 | <i>Sphingomonas</i> sp. W2.10-2       | JX458462 | 100 | 821/821 | Welsh onion rhizosphere soil |
| GUAF3038 | <i>Niastella</i> sp. KP03             | AB329629 | 98  | 857/870 | Welsh onion rhizosphere soil |
| GUAF3039 | <i>Sphingomonas</i> sp. W2.10-2       | JX458462 | 100 | 837/837 | Welsh onion rhizosphere soil |
| GUAF3040 | <i>Sphingomonas</i> sp. M37-VN10-2W   | AB299579 | 100 | 813/813 | Welsh onion rhizosphere soil |
| GUAF3041 | <i>Microbacterium</i> sp. MA1         | FJ357539 | 99  | 820/821 | Welsh onion rhizosphere soil |
| GUAF3042 | <i>Microbacterium oxydans</i>         | DQ350825 | 100 | 851/851 | Welsh onion rhizosphere soil |
| GUAF3043 | <i>Frateuria terrea</i>               | KC854841 | 99  | 829/837 | Welsh onion rhizosphere soil |
| GUAF3044 | <i>Sphingomonas</i> sp. W2.10-2       | JX458462 | 100 | 810/810 | Welsh onion rhizosphere soil |

#### Isolation trial 2 (R2A)

|          |                                      |          |     |         |                              |
|----------|--------------------------------------|----------|-----|---------|------------------------------|
| GUAF3153 | <i>Niabella</i> sp. PD7-3            | AB506121 | 100 | 848/848 | Welsh onion rhizosphere soil |
| GUAF3154 | <i>Sphingopyxis</i> sp. TBD181       | LC005606 | 100 | 648/648 | Welsh onion rhizosphere soil |
| GUAF3155 | <i>Sphingomonas</i> sp. W2.10-2      | JX458462 | 99  | 851/852 | Welsh onion rhizosphere soil |
| GUAF3156 | <i>Sphingomonas</i> sp. W2.10-2      | JX458462 | 100 | 664/664 | Welsh onion rhizosphere soil |
| GUAF3157 | <i>Sphingomonas</i> sp. JB13         | JF745870 | 99  | 799/801 | Welsh onion rhizosphere soil |
| GUAF3159 | <i>Sphingomonas</i> sp. W2.10-2      | JX458462 | 100 | 844/844 | Welsh onion rhizosphere soil |
| GUAF3160 | <i>Taibaiella</i> sp. T1-10          | KR078254 | 93  | 759/809 | Welsh onion rhizosphere soil |
| GUAF3161 | <i>Niabella yanshanensis</i>         | KC854959 | 99  | 645/646 | Welsh onion rhizosphere soil |
| GUAF3162 | <i>Mycobacterium neoaurum</i>        | FJ172311 | 99  | 586/587 | Welsh onion rhizosphere soil |
| GUAF3163 | <i>Stenotrophomonas</i> sp. ZWS18    | KM051417 | 100 | 868/868 | Welsh onion rhizosphere soil |
| GUAF3165 | <i>Chryseobacterium</i> sp. 91A-561T | HG738132 | 97  | 812/830 | Welsh onion rhizosphere soil |
| GUAF3166 | <i>Leifsonia</i> sp. SaZR8           | JQ806448 | 99  | 850/852 | Welsh onion rhizosphere soil |
| GUAF3167 | <i>Sphingomonas</i> sp. 8b-1         | AY561541 | 99  | 753/755 | Welsh onion rhizosphere soil |
| GUAF3169 | <i>Sphingomonas</i> sp. 8b-1         | AY561541 | 100 | 854/854 | Welsh onion rhizosphere soil |

#### Isolation trial 2 (R2A-C/T<sup>c</sup>)

|          |                              |          |     |         |                              |
|----------|------------------------------|----------|-----|---------|------------------------------|
| GUAF4001 | <i>Niabella yanshanensis</i> | KC854959 | 100 | 845/845 | Welsh onion rhizosphere soil |
|----------|------------------------------|----------|-----|---------|------------------------------|

|          |                              |          |     |         |                              |
|----------|------------------------------|----------|-----|---------|------------------------------|
| GUAF4002 | <i>Niabella yanshanensis</i> | KC854959 | 99  | 831/833 | Welsh onion rhizosphere soil |
| GUAF4004 | <i>Niabella</i> sp. PD7-3    | AB506121 | 100 | 773/774 | Welsh onion rhizosphere soil |
| GUAF4005 | <i>Niabella</i> sp. PD7-3    | AB506121 | 99  | 818/819 | Welsh onion rhizosphere soil |
| GUAF4006 | <i>Niabella yanshanensis</i> | KC854959 | 100 | 754/754 | Welsh onion rhizosphere soil |
| GUAF4007 | <i>Niabella yanshanensis</i> | KC854959 | 100 | 845/845 | Welsh onion rhizosphere soil |
| GUAF4012 | <i>Niabella yanshanensis</i> | KC854959 | 100 | 844/844 | Welsh onion rhizosphere soil |
| GUAF4013 | <i>Niabella yanshanensis</i> | KC854959 | 100 | 844/844 | Welsh onion rhizosphere soil |
| GUAF4014 | <i>Niabella</i> sp. PD7-3    | AB506121 | 98  | 847/861 | Welsh onion rhizosphere soil |
| GUAF4015 | <i>Niabella yanshanensis</i> | KF307654 | 100 | 791/791 | Welsh onion rhizosphere soil |
| GUAF4016 | <i>Niabella yanshanensis</i> | KC854959 | 100 | 844/844 | Welsh onion rhizosphere soil |
| GUAF4017 | <i>Niabella yanshanensis</i> | KC854959 | 100 | 844/844 | Welsh onion rhizosphere soil |
| GUAF4018 | <i>Niabella</i> sp. PD7-3    | AB506121 | 100 | 853/853 | Welsh onion rhizosphere soil |
| GUAF4019 | <i>Niabella yanshanensis</i> | KC854959 | 100 | 844/844 | Welsh onion rhizosphere soil |

### Isolation trial 3 (R2A-C/T)

|          |                                       |          |     |         |                              |
|----------|---------------------------------------|----------|-----|---------|------------------------------|
| GUAF7048 | <i>Niabella yanshanensis</i>          | KC854959 | 98  | 717/725 | Welsh onion rhizosphere soil |
| GUAF7049 | <i>Chryseobacterium</i> sp. 91A-612   | KP271932 | 98  | 752/765 | Welsh onion rhizosphere soil |
| GUAF7050 | <i>Chryseobacterium</i> sp. 91A-593T  | HG738134 | 98  | 676/686 | Welsh onion rhizosphere soil |
| GUAF7051 | <i>Chryseobacterium</i> sp. 91A-593T  | HG738134 | 98  | 791/801 | Welsh onion rhizosphere soil |
| GUAF7053 | <i>Taibaiella koreensis</i>           | KC252613 | 95  | 801/842 | Welsh onion rhizosphere soil |
| GUAF7055 | <i>Chryseobacterium daecheongense</i> | AJ457206 | 98  | 798/811 | Welsh onion rhizosphere soil |
| GUAF7095 | <i>Niabella yanshanensis</i>          | KC854959 | 98  | 706/716 | Welsh onion rhizosphere soil |
| GUAF7096 | <i>Niabella yanshanensis</i>          | KC854959 | 100 | 836/836 | Welsh onion rhizosphere soil |
| GUAF7108 | <i>Niabella</i> sp. PD7-3             | AB506121 | 99  | 798/799 | Welsh onion rhizosphere soil |
| GUAF7110 | <i>Niabella yanshanensis</i>          | KC854959 | 98  | 716/725 | Welsh onion rhizosphere soil |
| GUAF7113 | <i>Niabella yanshanensis</i>          | KC854959 | 99  | 688/693 | Welsh onion rhizosphere soil |
| GUAF7114 | <i>Flavitalea</i> sp. KIS20-3         | KM007101 | 94  | 650/688 | Welsh onion rhizosphere soil |
| GUAF7115 | <i>Niastella</i> sp. KP03             | AB329629 | 99  | 675/676 | Welsh onion rhizosphere soil |
| GUAF7117 | <i>Niabella yanshanensis</i>          | KC854959 | 98  | 676/684 | Welsh onion rhizosphere soil |
| GUAF7119 | <i>Niabella yanshanensis</i>          | KC854959 | 98  | 804/816 | Welsh onion rhizosphere soil |
| GUAF7120 | <i>Niabella yanshanensis</i>          | KF307654 | 100 | 716/716 | Welsh onion rhizosphere soil |
| GUAF7121 | <i>Niastella</i> sp. KP03             | AB329629 | 99  | 754/756 | Welsh onion rhizosphere soil |

**Isolation trial 3 (PSR2A-C/T<sup>d</sup>)**

|                     |                                        |          |    |         |                              |
|---------------------|----------------------------------------|----------|----|---------|------------------------------|
| GUAF7001            | <i>Stenotrophomonas maltophilia</i>    | KF263488 | 99 | 760/761 | Welsh onion rhizosphere soil |
| GUAF7002 (LC096244) | <i>Chryseobacterium</i> sp. 91A-593T   | HG738134 | 98 | 796/805 | Welsh onion rhizosphere soil |
| GUAF7003 (LC096245) | <i>Chryseobacterium</i> sp. JIP 108/83 | AY468458 | 99 | 831/832 | Welsh onion rhizosphere soil |
| GUAF7004 (LC096246) | <i>Chryseobacterium</i> sp. 91A-593T   | HG738134 | 98 | 658/693 | Welsh onion rhizosphere soil |
| GUAF7005 (LC096247) | <i>Chryseobacterium</i> sp. 91A-593T   | HG738134 | 98 | 796/805 | Welsh onion rhizosphere soil |
| GUAF7006 (LC096248) | <i>Chryseobacterium daecheongense</i>  | AJ457206 | 98 | 736/748 | Welsh onion rhizosphere soil |
| GUAF7007 (LC096249) | <i>Chryseobacterium daecheongense</i>  | AJ457206 | 98 | 798/812 | Welsh onion rhizosphere soil |
| GUAF7008 (LC096250) | <i>Chryseobacterium</i> sp. 91A-593T   | HG738134 | 98 | 606/616 | Welsh onion rhizosphere soil |
| GUAF7011 (LC096251) | <i>Chryseobacterium daecheongense</i>  | AJ457206 | 98 | 776/789 | Welsh onion rhizosphere soil |
| GUAF7018            | <i>Stenotrophomonas maltophilia</i>    | KF263488 | 99 | 811/812 | Welsh onion rhizosphere soil |
| GUAF7027 (LC096252) | <i>Flavobacterium</i> sp. THWCSN41     | AM888190 | 99 | 842/843 | Welsh onion rhizosphere soil |
| GUAF7029 (LC096253) | <i>Flavobacterium</i> sp. C-2          | HQ188912 | 99 | 795/801 | Welsh onion rhizosphere soil |
| GUAF7031 (LC096254) | <i>Flavobacterium</i> sp. THWCSN41     | AM888190 | 99 | 828/829 | Welsh onion rhizosphere soil |
| GUAF7033 (LC096255) | <i>Flavobacterium</i> sp. WG1          | FN547415 | 98 | 731/743 | Welsh onion rhizosphere soil |
| GUAF7073            | <i>Microbacterium testaceum</i>        | AF474330 | 99 | 817/818 | Welsh onion rhizosphere soil |
| GUAF7105 (LC096256) | <i>Flavobacterium</i> sp. CC-JY-6      | DQ239767 | 97 | 778/798 | Welsh onion rhizosphere soil |
| GUAF7120            | <i>Niabella yanshanensis</i>           | KF307654 | 99 | 689/690 | Welsh onion rhizosphere soil |
| GUAF7122            | <i>Taibaiella koreensis</i>            | KC252613 | 94 | 647/683 | Welsh onion rhizosphere soil |

**Isolation trial 4 (PSR2A-C/T)**

|                     |                                       |          |     |         |                              |
|---------------------|---------------------------------------|----------|-----|---------|------------------------------|
| GUAF6003            | <i>Niabella yanshanensis</i>          | KC854959 | 99  | 843/844 | Welsh onion rhizosphere soil |
| GUAF6004 (LC034259) | <i>Flavobacterium</i> sp. THWCSN41    | AM888190 | 99  | 841/842 | Welsh onion rhizosphere soil |
| GUAF6005 (LC034260) | <i>Flavobacterium</i> sp. THWCSN41    | AM888190 | 99  | 854/856 | Welsh onion rhizosphere soil |
| GUAF6006 (LC034273) | <i>Chryseobacterium daecheongense</i> | AJ457206 | 98  | 817/832 | Welsh onion rhizosphere soil |
| GUAF6007            | <i>Niabella yanshanensis</i>          | KC854959 | 100 | 830/830 | Welsh onion rhizosphere soil |
| GUAF6008 (LC034274) | <i>Chryseobacterium daecheongense</i> | AJ457206 | 98  | 803/815 | Welsh onion rhizosphere soil |
| GUAF6009 (LC034261) | <i>Flavobacterium</i> sp. THWCSN41    | AM888190 | 99  | 860/861 | Welsh onion rhizosphere soil |
| GUAF6018            | <i>Ralstonia mannitolilytica</i>      | KF150335 | 95  | 705/737 | Welsh onion rhizosphere soil |
| GUAF6020            | <i>Ralstonia mannitolilytica</i>      | KF150335 | 96  | 628/650 | Welsh onion rhizosphere soil |
| GUAF6022            | <i>Terrabacter</i> sp. MUSC78T        | KF682157 | 98  | 838/852 | Welsh onion rhizosphere soil |
| GUAF6023            | <i>Chitinophaga filiformis</i>        | JX280517 | 98  | 809/821 | Welsh onion rhizosphere soil |
| GUAF6025 (LC034278) | <i>Chryseobacterium wanjuense</i>     | DQ256729 | 99  | 802/803 | Welsh onion rhizosphere soil |

|                     |                                        |          |     |         |                              |
|---------------------|----------------------------------------|----------|-----|---------|------------------------------|
| GUAF6037            | <i>Niabella</i> sp. PD7-3              | AB506121 | 100 | 866/866 | Welsh onion rhizosphere soil |
| GUAF6038 (LC034275) | <i>Chryseobacterium</i> sp. JIP 108/83 | AY468458 | 100 | 854/854 | Welsh onion rhizosphere soil |
| GUAF6039            | <i>Niabella yanshanensis</i>           | KC854959 | 100 | 843/843 | Welsh onion rhizosphere soil |
| GUAF6040 (LC034262) | <i>Flavobacterium johnsoniae</i>       | EU221404 | 98  | 737/745 | Welsh onion rhizosphere soil |
| GUAF6043 (LC034276) | <i>Chryseobacterium daecheongense</i>  | AJ457206 | 97  | 843/862 | Welsh onion rhizosphere soil |
| GUAF6047 (LC034277) | <i>Chryseobacterium daecheongense</i>  | AJ457206 | 98  | 867/881 | Welsh onion rhizosphere soil |
| GUAF6049 (LC034263) | <i>Flavobacterium</i> sp. THWCSN41     | AM888190 | 99  | 877/879 | Welsh onion rhizosphere soil |
| GUAF6074            | <i>Ralstonia pickettii</i>             | CP001645 | 99  | 816/817 | Welsh onion rhizosphere soil |
| GUAC6011 (LC034272) | <i>Chryseobacterium</i> sp. 91A-561T   | HG738132 | 99  | 812/819 | Onion rhizosphere soil       |
| GUAC6025            | <i>Niabella</i> sp. PD7-3              | AB506121 | 97  | 834/858 | Onion rhizosphere soil       |
| GUAC6026            | <i>Taibaiella koreensis</i>            | KC252613 | 95  | 761/800 | Onion rhizosphere soil       |
| GUAC6027            | <i>Taibaiella koreensis</i>            | KC252613 | 94  | 800/850 | Onion rhizosphere soil       |
| GUAC6028 (LC034268) | <i>Chryseobacterium daecheongense</i>  | AJ457206 | 97  | 793/810 | Onion rhizosphere soil       |
| GUAC6034            | <i>Leifsonia</i> sp. SIU               | KJ191763 | 99  | 671/673 | Onion rhizosphere soil       |
| GUAC6036            | <i>Pseudoxanthomonas</i> sp. CHNTR38   | DQ337597 | 95  | 815/852 | Onion rhizosphere soil       |
| GUAC6038            | <i>Leifsonia</i> sp. SIU               | KJ191763 | 99  | 829/834 | Onion rhizosphere soil       |
| GUAC6047            | <i>Ralstonia pickettii</i> 12D         | CP001645 | 100 | 852/852 | Onion rhizosphere soil       |
| GUAC6048            | <i>Ralstonia pickettii</i> 12D         | CP001645 | 100 | 838/838 | Onion rhizosphere soil       |
| GUAC6051 (LC034269) | <i>Chryseobacterium daecheongense</i>  | AJ457206 | 98  | 791/807 | Onion rhizosphere soil       |
| GUAC6052            | <i>Niabella yanshanensis</i>           | KC854959 | 98  | 830/841 | Onion rhizosphere soil       |
| GUAC6053            | <i>Niabella</i> sp. PD7-3              | AB506121 | 100 | 866/866 | Onion rhizosphere soil       |
| GUAC6054            | <i>Niabella yanshanensis</i>           | KC854959 | 99  | 842/843 | Onion rhizosphere soil       |
| GUAC6055 (LC034267) | <i>Flavobacterium</i> sp. THWCSN41     | AM888190 | 99  | 860/862 | Onion rhizosphere soil       |
| GUAC6056 (LC034270) | <i>Chryseobacterium daecheongense</i>  | AJ457206 | 98  | 818/833 | Onion rhizosphere soil       |
| GUAC6058 (LC034271) | <i>Chryseobacterium daecheongense</i>  | AJ457206 | 98  | 856/870 | Onion rhizosphere soil       |
| GUAC6072 (LC034266) | <i>Flavobacterium johnsoniae</i>       | EU221404 | 99  | 779/780 | Onion rhizosphere soil       |
| GUAC6109            | <i>Niabella yanshanensis</i>           | KC854959 | 98  | 820/829 | Onion rhizosphere soil       |
| GUAC6113            | <i>Niabella yanshanensis</i>           | KC854959 | 98  | 789/797 | Onion rhizosphere soil       |
| GUAC6114            | <i>Chitinophaga</i> sp. BS20           | JF806524 | 94  | 987/728 | Onion rhizosphere soil       |
| GUAC6170 (LC034264) | <i>Flavobacterium</i> sp. THWCSN41     | AM888190 | 99  | 864/867 | Onion rhizosphere soil       |
| GUAC6174 (LC034265) | <i>Flavobacterium</i> sp. THWCSN41     | AM888190 | 99  | 799/801 | Onion rhizosphere soil       |

#### Isolation trial 4(PSR2A-C/T/N<sup>6</sup>)

|          |                                              |          |     |         |                              |
|----------|----------------------------------------------|----------|-----|---------|------------------------------|
| GUAF5001 | <i>Microbacterium</i> sp. W1.10-194          | JX458442 | 99  | 840/841 | Welsh onion rhizosphere soil |
| GUAF5002 | <i>Microbacterium</i> sp. W1.10-194          | JX458442 | 99  | 840/841 | Welsh onion rhizosphere soil |
| GUAF5003 | <i>Microbacterium oleivorans</i>             | EF522131 | 100 | 689/698 | Welsh onion rhizosphere soil |
| GUAF5024 | <i>Chryseobacterium wanjuae</i>              | DQ256729 | 99  | 845/850 | Welsh onion rhizosphere soil |
| GUAF5027 | <i>Variovorax soli</i> NBRC 106424           | DQ432053 | 99  | 859/861 | Welsh onion rhizosphere soil |
| GUAF5028 | <i>Agrococcus</i> sp. SS14.8                 | KC160779 | 100 | 850/850 | Welsh onion rhizosphere soil |
| GUAF5029 | <i>Leifsonia xyli</i>                        | HQ530514 | 99  | 812/814 | Welsh onion rhizosphere soil |
| GUAF5030 | <i>Chitinophaga</i> sp. R3-710               | JQ659659 | 98  | 837/849 | Welsh onion rhizosphere soil |
| GUAF5031 | <i>Chitinophaga</i> sp. LWH185               | KC854879 | 99  | 843/850 | Welsh onion rhizosphere soil |
| GUAF5032 | <i>Microbacterium kyungheense</i>            | JX997973 | 99  | 850/851 | Welsh onion rhizosphere soil |
| GUAF5035 | <i>Microbacterium oleivorans</i>             | EF522131 | 99  | 821/823 | Welsh onion rhizosphere soil |
| GUAF5085 | <i>Leifsonia</i> sp. SaZR8                   | JQ806448 | 99  | 697/698 | Welsh onion rhizosphere soil |
| GUAF5086 | <i>Leifsonia</i> sp. SaZR8                   | JQ806448 | 99  | 846/850 | Welsh onion rhizosphere soil |
| GUAF5087 | <i>Dyadobacter fermentans</i> DSM 18053      | CP001619 | 99  | 794/796 | Welsh onion rhizosphere soil |
| GUAF5119 | <i>Sphingopyxis</i> sp. TBD181               | LC005606 | 100 | 814/814 | Welsh onion rhizosphere soil |
| GUAC5008 | <i>Niabella</i> sp. PD7-3                    | AB506121 | 99  | 846/851 | Onion rhizosphere soil       |
| GUAC5009 | <i>Niabella</i> sp. PD7-3                    | AB506121 | 99  | 846/852 | Onion rhizosphere soil       |
| GUAC5010 | <i>Niabella</i> sp. PD7-3                    | AB506121 | 98  | 852/863 | Onion rhizosphere soil       |
| GUAC5012 | <i>Microbacterium paraoxydans</i>            | EU221351 | 99  | 858/861 | Onion rhizosphere soil       |
| GUAC5013 | <i>Chitinophaga arvensicola</i>              | AB681050 | 99  | 805/811 | Onion rhizosphere soil       |
| GUAC5014 | <i>Chitinophaga terrae</i> Kim and Jung 2007 | KF150367 | 94  | 823/867 | Onion rhizosphere soil       |
| GUAC5015 | <i>Niabella yanshanensis</i>                 | KC854959 | 98  | 826/835 | Onion rhizosphere soil       |
| GUAC5053 | <i>Leifsonia</i> sp. SIU                     | KJ191763 | 99  | 833/840 | Onion rhizosphere soil       |
| GUAC5054 | <i>Leifsonia</i> sp. SIU                     | KJ191763 | 99  | 860/862 | Onion rhizosphere soil       |
| GUAC5057 | <i>Leifsonia xyli</i>                        | HQ530514 | 99  | 850/853 | Onion rhizosphere soil       |
| GUAC5058 | <i>Chryseobacterium scophthalmum</i>         | KC178594 | 98  | 835/852 | Onion rhizosphere soil       |
| GUAC5060 | <i>Chryseobacterium</i> sp. 91A-561T         | HG738132 | 98  | 842/854 | Onion rhizosphere soil       |
| GUAC5061 | <i>Microbacterium hydrocarbonoxydans</i>     | AJ698726 | 100 | 819/819 | Onion rhizosphere soil       |
| GUAC5062 | <i>Sphingomonas</i> sp. M37-VN10-2W          | AB299579 | 98  | 861/872 | Onion rhizosphere soil       |
| GUAC5063 | <i>Leifsonia</i> sp. SIU                     | KJ191763 | 99  | 821/828 | Onion rhizosphere soil       |
| GUAC5064 | <i>Leifsonia</i> sp. SIU                     | KJ191763 | 99  | 861/893 | Onion rhizosphere soil       |
| GUAC5099 | <i>Chryseobacterium indologenes</i>          | EU221399 | 99  | 799/804 | Onion rhizosphere soil       |
| GUAC5111 | <i>Niabella</i> sp. PD7-3                    | AB506121 | 99  | 845/850 | Onion rhizosphere soil       |
| GUAC5112 | <i>Niabella yanshanensis</i>                 | KC854959 | 98  | 763/771 | Onion rhizosphere soil       |

<sup>a</sup> 1/4-strength tryptic soy agar

<sup>b</sup> Reasoner's 2A agar

<sup>c</sup> Reasoner's 2A supplemented with cycloheximide and tobramycin

<sup>d</sup> Phosphate separately autoclaved R2A supplemented with cycloheximide and tobramycin

<sup>e</sup> Phosphate separately autoclaved R2A supplemented with cycloheximide, tobramycin, and NaCl
